# Supplementary material for: Semiautomated TaqMan PCR screening of GMO labelled samples for (unauthorised) GMOs
Source: PubMed Central journal article supplement (PMC5427157; doi:10.1007/s00216-017-0333-7), 2017-04-17
Supplement: 216_2017_333_MOESM1_ESM.pdf [file 216_2017_333_MOESM1_ESM.pdf]

## **Analytical and Bioanalytical Chemistry**

### **Electronic Supplementary Material**

#### **Semiautomated TaqMan PCR screening of GMO labelled samples for (unauthorised) GMOs**

Ingrid M.J. Scholtens, Bonnie Molenaar, Richard A. van Hoof, Stephanie Zaaijer, Theo W. Prins, Esther J. Kok

Additional file (216\_2017\_333\_MOESM2\_ESM.xlsx) available under  
“Supplementary Material”
